# Supplementary material for: Fischer–Helferich glycosidation mechanism of glucose to methyl glycosides over Al-based catalysts in alcoholic media
Source: Royal Society of Chemistry journal article supplement (doi:10.1039/d2ra03945a), 2022-01-01
Supplement: d2ra03945a1.pdf [file d2ra03945a1.pdf]

## Supplementary Information

# Fischer-Helferich Glycosidation Mechanism of Glucose to Methyl Glycosides over Al-Based Catalysts in Alcoholic Media

*Mengting Yu<sup>a</sup>, Yao Li<sup>b</sup>, Cheng Zhang<sup>c</sup>, Huaying Luo<sup>c</sup>, Chengsheng Ge<sup>a</sup>, Xiaobin  
Chen<sup>a</sup>, Lanlan Fu<sup>a</sup>, Zhaoyang Ju<sup>\*a,c</sup> and Xiaoqian Yao<sup>\*b</sup>*

*<sup>a</sup>College of Chemical & Material Engineering, Quzhou University, Quzhou 324000, P.  
R. China*

*<sup>b</sup>CAS Key Laboratory of Green Process and Engineering, Beijing Key Laboratory of  
Ionic Liquids Clean Process, State Key Laboratory of Multiphase Complex Systems,  
Institute of Process Engineering, Chinese Academy of Sciences, Beijing 100190, P. R.  
China*

*<sup>c</sup>Xianhe Co., Ltd, Quzhou 324000, P. R. China*

*\*Corresponding author: Zhaoyang Ju, Email: jzy@qzc.edu.cn; Xiaoqian Yao,  
Email: xqyao@ipe.ac.cn;*

# Contents

1. Figure S1: The Mayer bond analysis of C-O bond of glucose.
2. Figure S2: Potential energy 3D surface scan for the direct etherification reaction.
3. Table S1: The NPA charge of IM1 and IM2 calculated in M06-2X/6-311+G\*\* level. (unit a.u.)
4. Figure S3-S4, S6-S7: The various ring closure reaction without catalysts.
5. Figure S5: The computed energy (kcal/mol) profile with the structures of reactants, transition states, and products for the dehydration of the product of O5-C2 and O2-C5 to make 5-MMF.
6. Table S2: The XYZ coordinates of all TSs which includes ring-opening, addition and ring-closure reaction without catalysts.
7. Table S3: The XYZ coordinates of all TSs from glucose to MDGP catalyzed by  $[\text{Al}(\text{CH}_3\text{O})_2(\text{CH}_3\text{OH})_2]^+$

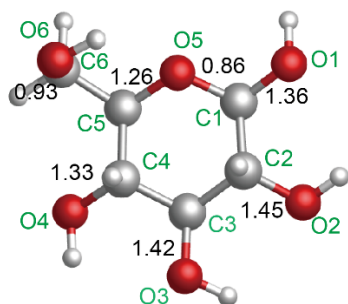

**Figure S 1** The Mayer bond analysis of C-O bond of glucose calculated at M06-2X-D3/6-311+G\*\* level.

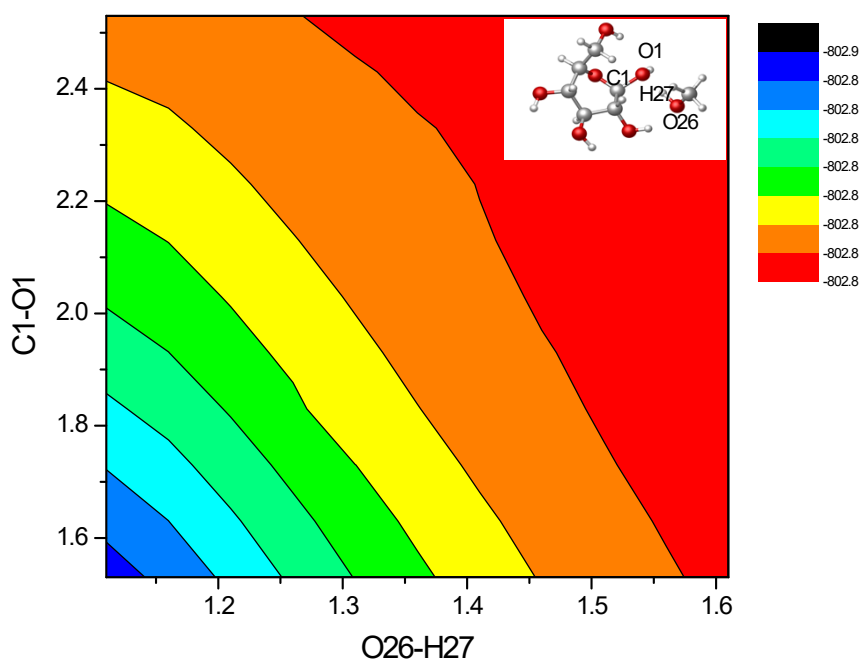

**Figure S 2** Potential energy 3D surface scan for the direct etherification reaction along with the increasing both C1-O1 (the steps and step size are 10 and 0.10 Å ) and O26-H27 bond (the steps and step size are 10 and 0.05 Å).

**Table S 1** The NPA charge of IM1 and IM2 calculated in M06-2X-D3/6-311+G\*\* level. (unit a.u.)

|            |       | Methoxyl | 1      | 2      | 3      | 4      | 5      | 6      |
|------------|-------|----------|--------|--------|--------|--------|--------|--------|
| <b>IM1</b> | O(OH) | -        | -0.552 | -0.767 | -0.773 | -0.760 | -0.773 | -0.773 |
|            | H(OH) | -        | -      | 0.496  | 0.502  | 0.490  | 0.491  | 0.478  |
|            | C     | -        | 0.427  | -0.001 | 0.094  | 0.091  | 0.087  | -0.055 |
|            | H     | -        | 0.164  | 0.212  | 0.172  | 0.187  | 0.191  | 0.169  |
|            | H     | -        | -      | -      | -      | -      | -      | 0.201  |
| <b>IM2</b> | O(OH) | -0.601   | -0.777 | -0.763 | -0.778 | -0.776 | -0.781 | -0.763 |
|            | H(OH) | -        | 0.477  | 0.499  | 0.499  | 0.495  | 0.493  | 0.473  |
|            | C     | -0.208   | 0.430  | 0.073  | 0.078  | 0.098  | 0.074  | -0.054 |
|            | H     | 0.189    | 0.166  | 0.173  | 0.185  | 0.197  | 0.212  | 0.173  |
|            | H     | 0.171    | -      | -      | -      | -      | -      | 0.176  |
|            | H     | 0.170    | -      | -      | -      | -      | -      | -      |

### The three-membered ring closure reaction

The presence of hydroxyls provides possible ways to dehydrate three-membered ring products with the neighboring hydrogen with hydroxyls. As mentioned before, since there are six hydroxyls in IM2, it provides the possibility to undergo the three-membered ring closure reaction through two adjacent C, O atoms (O1-C2, O2-C3, O3-C4, O4-C5, and O5-C6), and oppositely close loop (O2-C1, O3-C2, O4-C3, O5-C4, and O6-C5). For the three-membered ring closure reaction, the computed energy profile of the ring-closure reaction is shown in Figure S3. The energy barrier of the three-membered ring closure reaction is ranging from 53.6 to 80.3 kcal/mol. They are endothermic by about 12.3~22.7 kcal/mol. The energy barrier of various ways to render the same product, taking O1-C2 and O2-C1 for example, is also different. O3-C4 is not preferable with an 80.3 kcal/mol energy barrier. While the energy barrier of O1-C2 (72.3 kcal/mol) is relatively higher than that of O2-C1 (53.6 kcal/mol). So, the lowest energy barrier for the three-membered ring closure reaction is the O2-C1 way.

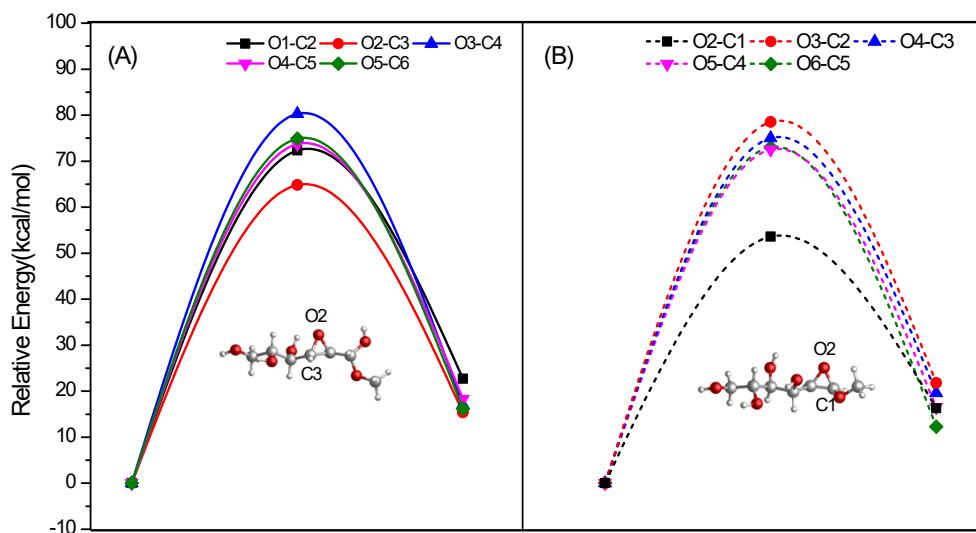

**Figure S3** The potential energy (kcal/mol) profile of ring-closure reaction for the three-membered ring with different ways (A) O1-C2, O2-C3, O3-C4, O4-C5 and O5-C6 (B) O6-C5, O5-C4, O4-C3, O3-C2, and O2-C1.

### The four-membered ring closure reaction

To compare the ability to generate differently membered ring products, the possible routes in four-membered ring closure reactions were also probed. There are eight kinds of ways for the four-membered ring closure reaction, whose computed energy profiles are displayed in Figure S4. The energy barriers for the four-membered ring closure reactions (O1-C3, O2-C4, O3-C5, O4-C6, O6-C4, O5-C3, O4-C2, and O3-C1) are 77.1, 79.9, 92.3, 81.3, 82.7, 88.2, 82.2 and 57.7 kcal/mol, respectively. The energy barrier of the four-membered ring closure reaction is in the range of 57.7~92.3 kcal/mol. These processes are endothermic with about 13.0~19.1 kcal/mol. Compared with the different ways for the four-membered ring closure reaction, it is hard to achieve the O3-C5 ring closure reaction due to the relatively high energy barrier (92.3 kcal/mol), and the O3-C1 is easier to undergo with 57.7 kcal/mol energy barrier.

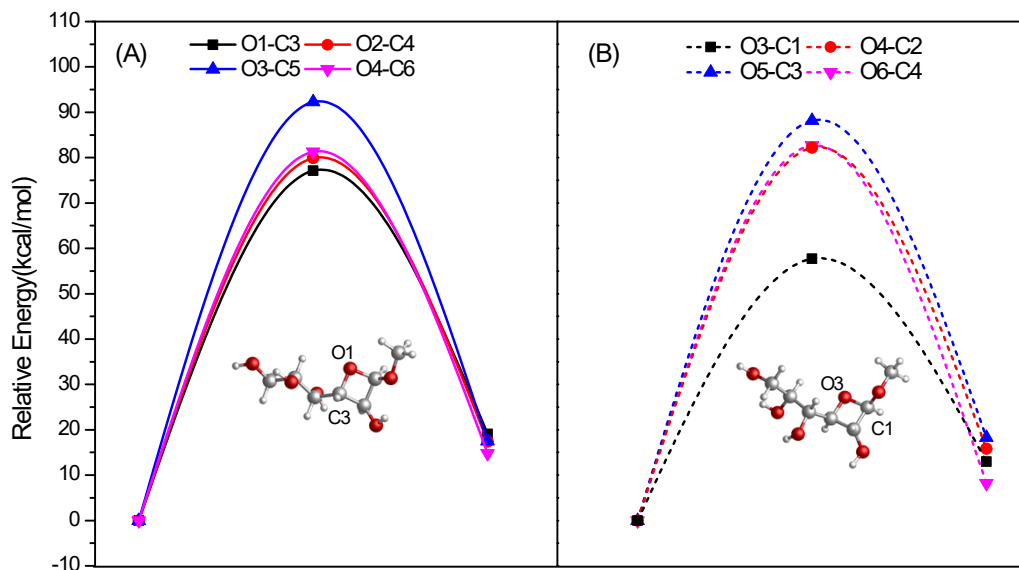

**Figure S4** The potential energy (kcal/mol) profile of ring-closure reaction for the four-membered ring with different ways (A) O1-C3, O2-C4, O3-C5, and O4-C6 (B) O6-C4, O5-C3, O4-C2, and O3-C1.

## The five-membered ring closure reaction

In the conversion of glucose in methanol media, there are some important intermediates, such as methyl fructoside, 5-methoxymethylfurfural (5-MMF) which have five-membered ring structures.<sup>1</sup> Some studies reported that the formation of methyl fructoside is the etherification reaction of fructose.<sup>2</sup> The methyl fructoside and the product of O5-C2/O2-C5 ring closure are isomers where the hydroxyl is located in C2 and C1, respectively. Hydroxyl isomerization is very common in the conversion of glucose to valuable biofuels.<sup>3, 4</sup> Actually, it also makes a possible route to generate methyl fructoside from glucose in the methanol solvent. Furthermore, it provides potential reaction pathways to generate 5-MMF which is another important intermediate found in the experiments.<sup>5</sup> The dehydration of the product of O5-C2 and O2-C5 rendering the 5-MMF was described in Figure S5. Besides, methyl furanose can come from the product of O4-C1 and C1-O4 which is also detected by the GC-MS experiments.<sup>5</sup>

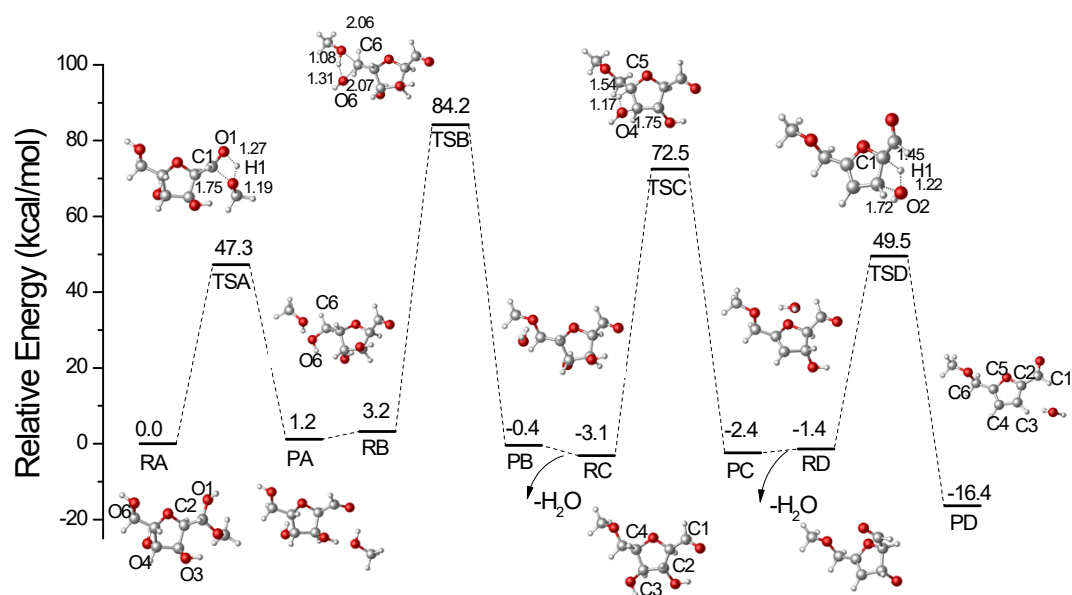

**Figure S5** The computed energy (kcal/mol) profile with the structures of reactants, transition states, and products for the dehydration of the product of O5-C2 and O2-C5 to make 5-MMF.

Considering all the possible ways for the five-membered ring, the energy profile of five-membered ring closure reactions was calculated and listed in Figure S6. The energy barrier of the five-membered ring closure reaction ranges between 65.1 and 76.3 kcal/mol. And O1-C4, O2-C5, O3-C6, O4-C1, and O5-C2 are exothermic with -1.3, -4.6, -0.8, -3.5, and -5.5 kcal/mol, only O6-C3 is endothermic with 1.8 kcal/mol. The energy barriers for the O5-C2 and O2-C5 are 74.7 and 70.9 kcal/mol, respectively. Compared with the different ways of the five-membered ring closure reaction, O4-C1 has the lowest energy barrier with 65.1 kcal/mol.

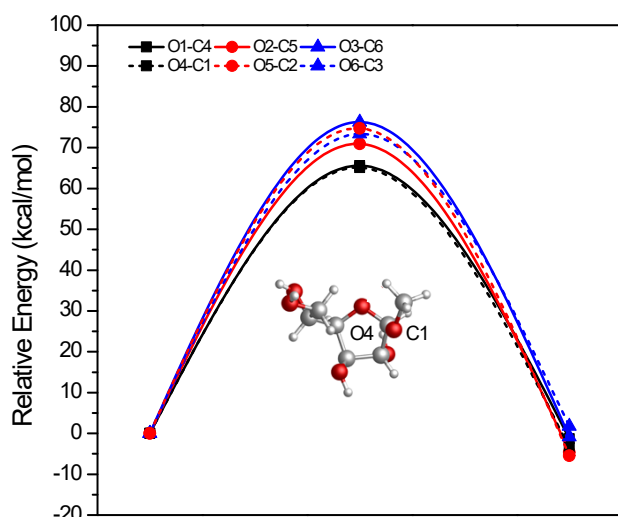

**Figure S6** The potential energy (kcal/mol) profile of ring-closure reaction five-membered ring.

### The six-membered ring closure reaction

As one of the important intermediates, MDGP has a six-membered ring structure.<sup>2,5</sup> There are four kinds of ways to make the six-membered ring closure reaction which are O1-C5, O2-C6, O6-C2, and O5-C1. As shown in Figure S7, the energy barriers of six-membered ring closure reactions are ranging from 52.8 to 71.1 kcal/mol. All the routes are exothermic with about -5.4~12.0 kcal/mol. As the number of formed rings increases, it gradually changes from endothermic to exothermic in thermodynamics. To obtain MDGP, there are two kinds of ways which are O5-C1 and O1-C5. It is easier to proceed through O5-C1 (52.8 kcal/mol) which is lower than O1-C5 (70.3 kcal/mol). The H5 of O5 transfers to O1H1 and the O5-C1 bond will be formed to produce MDGP based on the pathway with the lowest energy barrier.



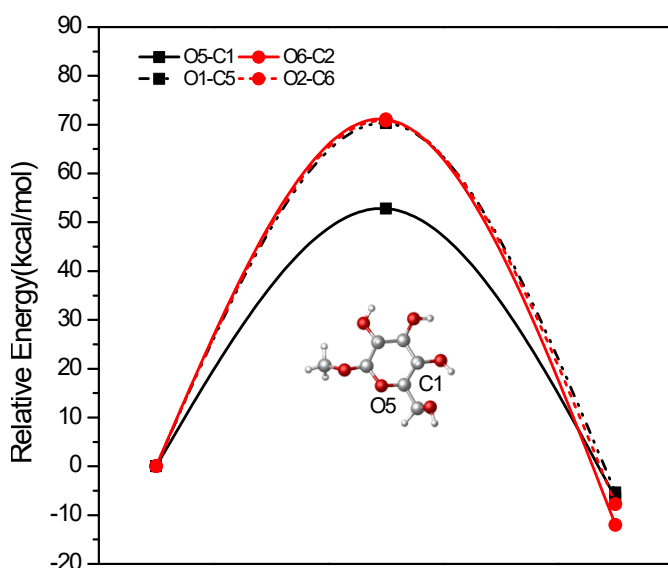

**Figure S7** The potential energy (kcal/mol) profile of ring-closure reaction for the six-membered ring.

**Table S 2** The XYZ coordinates of all TSs which includes ring-opening, addition and ring-closure reaction without catalysts.

| TS1 |           |           |           | TS2 |           |           |           |
|-----|-----------|-----------|-----------|-----|-----------|-----------|-----------|
| C   | -1.029023 | 0.960982  | -0.223289 | C   | -0.064377 | -0.158583 | 0.930064  |
| C   | -1.528735 | -0.373979 | 0.298188  | C   | 0.958040  | -0.325737 | -0.208774 |
| C   | -0.917906 | -1.557246 | -0.446686 | C   | 2.327464  | -0.154673 | 0.443906  |
| C   | 1.293176  | 0.133835  | -0.714641 | C   | -2.066960 | -0.060872 | -0.712139 |
| C   | 0.451716  | 1.120560  | 0.087814  | C   | -1.483666 | -0.627127 | 0.587246  |
| H   | -1.266511 | -0.471039 | 1.358540  | H   | 0.868218  | -1.347090 | -0.603670 |
| H   | -1.189750 | 1.020645  | -1.310877 | H   | 0.270751  | -0.810469 | 1.755350  |
| H   | 1.377592  | 0.518350  | -1.735524 | H   | -1.564301 | -0.551019 | -1.551618 |
| H   | 0.601634  | 0.949326  | 1.162277  | H   | -2.124835 | -0.313444 | 1.419616  |
| H   | -1.358278 | -1.703033 | -1.441870 | H   | 2.648863  | -1.059614 | 0.987931  |
| O   | 0.657035  | -1.150997 | -0.792611 | O   | -1.818369 | 1.326833  | -0.854653 |
| O   | 0.910139  | 2.402293  | -0.278096 | O   | -1.511264 | -2.038943 | 0.429319  |
| H   | 0.305393  | 3.043437  | 0.112099  | H   | -1.529546 | -2.451166 | 1.295766  |
| O   | -1.688230 | 2.027833  | 0.424921  | O   | -0.143794 | 1.178002  | 1.367268  |
| H   | -2.634315 | 1.846566  | 0.400641  | H   | 0.770683  | 1.507215  | 1.435537  |
| O   | -2.936103 | -0.381023 | 0.125069  | O   | 0.817288  | 0.605537  | -1.244625 |
| H   | -3.311660 | -1.112882 | 0.622847  | H   | 0.054048  | 1.177859  | -1.070552 |
| C   | 2.682686  | -0.047566 | -0.122882 | C   | -3.557435 | -0.337278 | -0.800650 |
| H   | 3.287746  | -0.674837 | -0.784489 | H   | -3.925210 | 0.075280  | -1.745082 |
| H   | 3.144752  | 0.938987  | -0.054398 | H   | -3.734483 | -1.417163 | -0.774659 |

|                                             |           |           |           |           |           |           |           |
|---------------------------------------------|-----------|-----------|-----------|-----------|-----------|-----------|-----------|
| O                                           | 2.625494  | -0.577708 | 1.185753  | O         | -4.168047 | 0.309692  | 0.308717  |
| H                                           | 2.593843  | -1.536324 | 1.148490  | H         | -5.108842 | 0.397581  | 0.149331  |
| O                                           | -0.554001 | -2.599106 | 0.245360  | O         | 2.575949  | 1.017731  | 1.013706  |
| H                                           | 0.623394  | -2.009048 | -0.031936 | H         | -2.031833 | 1.763943  | -0.021881 |
|                                             |           |           |           | C         | 4.588619  | -0.752663 | -0.571457 |
|                                             |           |           |           | H         | 4.358800  | -1.785714 | -0.827240 |
|                                             |           |           |           | H         | 4.965018  | -0.685796 | 0.452832  |
|                                             |           |           |           | H         | 5.321263  | -0.356198 | -1.271588 |
|                                             |           |           |           | O         | 3.393834  | 0.023807  | -0.710070 |
|                                             |           |           |           | H         | 3.386524  | 0.976123  | -0.116535 |
| <b>Ring-closure reaction</b>                |           |           |           |           |           |           |           |
| <b>Three numbered-ring closure reaction</b> |           |           |           |           |           |           |           |
| TS(O1-C2)                                   |           |           |           | TS(O2-C3) |           |           |           |
| C                                           | 0.264019  | 0.782374  | 0.279446  | C         | -0.118740 | 0.227271  | -0.260943 |
| C                                           | 1.372549  | 0.580319  | -0.690727 | C         | -1.285979 | -0.673296 | -0.332852 |
| C                                           | 2.425058  | -0.432997 | -0.395971 | C         | -2.586679 | -0.032476 | 0.131809  |
| C                                           | -2.191985 | 0.155256  | -0.071463 | C         | 2.365519  | 0.244362  | 0.085534  |
| C                                           | -0.769181 | -0.372728 | -0.000950 | C         | 1.170944  | -0.270078 | -0.728558 |
| H                                           | 1.295679  | 1.070262  | -1.651701 | H         | -1.437245 | -0.995768 | -1.380340 |
| H                                           | 0.661380  | 0.650448  | 1.289615  | H         | -0.155418 | 1.253187  | 0.095394  |
| H                                           | -2.287634 | 0.832977  | -0.928475 | H         | 2.323105  | -0.222043 | 1.077490  |
| H                                           | -0.693788 | -1.074454 | 0.834369  | H         | 1.202616  | 0.304406  | -1.691251 |
| O                                           | -2.434220 | 0.862839  | 1.138499  | O         | 2.232757  | 1.642334  | 0.177633  |
| O                                           | -0.518406 | -1.043706 | -1.223258 | O         | 1.237511  | -1.626969 | -0.974672 |
| H                                           | 0.201527  | -1.666754 | -1.044685 | H         | 0.532285  | -2.029751 | -0.398774 |
| O                                           | -0.257863 | 2.084497  | 0.105006  | O         | -0.119852 | 0.131881  | 2.189578  |
| H                                           | -1.045153 | 2.152750  | 0.662895  | H         | 0.575957  | 0.057836  | 2.845532  |
| C                                           | -3.194712 | -0.973526 | -0.222790 | C         | 3.672414  | -0.133445 | -0.585934 |
| H                                           | -3.068978 | -1.446921 | -1.198698 | H         | 3.780704  | -1.220151 | -0.601490 |
| H                                           | -3.036563 | -1.713945 | 0.570918  | H         | 3.678732  | 0.252029  | -1.613402 |
| O                                           | -4.471698 | -0.360439 | -0.090786 | O         | 4.681583  | 0.494372  | 0.193536  |
| H                                           | -5.157720 | -1.030218 | -0.105475 | H         | 5.543950  | 0.316824  | -0.186737 |
| O                                           | 1.778180  | -1.628191 | 0.087270  | O         | -2.931438 | 0.920867  | -0.814367 |
| C                                           | 2.708006  | -2.498620 | 0.711597  | C         | -4.098311 | 1.650742  | -0.475119 |
| H                                           | 3.217845  | -1.986295 | 1.529058  | H         | -3.979066 | 2.132880  | 0.502197  |
| H                                           | 2.144021  | -3.348265 | 1.093571  | H         | -4.229748 | 2.411787  | -1.241982 |
| H                                           | 3.451309  | -2.851256 | -0.013188 | H         | -4.970066 | 0.993859  | -0.450972 |
| O                                           | 3.089842  | 0.263024  | 0.518602  | H         | 3.082342  | 1.990874  | 0.471557  |
| H                                           | 2.924840  | 2.013397  | 0.205344  | O         | -0.862155 | -1.687584 | 0.510899  |
| H                                           | -3.390066 | 0.971294  | 1.215344  | H         | -0.382743 | -0.775152 | 1.901782  |
| H                                           | 3.009727  | -0.720466 | -1.288162 | H         | -2.449467 | 0.441737  | 1.117348  |
| O                                           | 2.365619  | 2.538008  | -0.402635 | O         | -3.574841 | -1.023514 | 0.212952  |
| H                                           | 1.679420  | 2.978732  | 0.112824  | H         | -3.139453 | -1.802126 | 0.585561  |
| TS(O3-C4)                                   |           |           |           | TS(O4-C5) |           |           |           |

|           |           |           |           |           |           |           |           |
|-----------|-----------|-----------|-----------|-----------|-----------|-----------|-----------|
| C         | 0.179743  | -0.272083 | 0.042667  | C         | -0.155592 | 0.068369  | -0.051817 |
| C         | 1.332404  | 0.329114  | -0.754340 | C         | -1.395166 | -0.747958 | -0.402067 |
| C         | 2.632145  | 0.115483  | 0.005850  | C         | -2.653383 | -0.078876 | 0.135282  |
| C         | -2.338024 | -0.633628 | -0.013991 | C         | 2.301113  | 0.200992  | -0.757112 |
| C         | -1.153320 | 0.217825  | -0.349207 | C         | 1.137577  | -0.676809 | -0.506250 |
| H         | 1.422148  | -0.180622 | -1.724194 | H         | -1.493314 | -0.792064 | -1.497502 |
| H         | 0.223067  | -1.369185 | -0.035984 | H         | -0.256087 | 1.032437  | -0.561210 |
| H         | -2.096906 | -1.303440 | 0.816988  | H         | 2.859335  | 0.176621  | -1.686128 |
| H         | -1.293808 | 1.014224  | -1.070938 | H         | 0.913518  | -1.308086 | -1.375942 |
| O         | -2.474786 | -1.357756 | -1.226644 | O         | 4.059966  | -1.044268 | -0.323467 |
| O         | -1.389496 | 2.019338  | 0.887513  | O         | 1.740319  | -1.346857 | 0.540318  |
| H         | -2.075743 | 2.043335  | 1.560143  | H         | 3.344871  | -1.462560 | 0.229401  |
| O         | 0.094307  | 0.166556  | 1.357595  | O         | -0.064745 | 0.307206  | 1.329698  |
| H         | -0.622274 | 1.443128  | 1.286720  | H         | 0.465476  | -0.445624 | 1.655119  |
| C         | -3.613262 | 0.145730  | 0.280178  | C         | 2.579829  | 1.342805  | 0.137777  |
| H         | -3.587955 | 0.528342  | 1.303534  | H         | 1.915247  | 2.138399  | -0.248689 |
| H         | -3.706815 | 0.979180  | -0.424673 | H         | 2.267519  | 1.119544  | 1.158440  |
| O         | -4.669507 | -0.788589 | 0.115969  | O         | 3.937399  | 1.722363  | 0.040175  |
| H         | -5.515035 | -0.338261 | 0.162026  | H         | 4.070404  | 2.533167  | 0.536708  |
| O         | 2.888496  | -1.251927 | -0.009690 | O         | -2.802384 | 1.128366  | -0.544596 |
| C         | 3.954840  | -1.642563 | 0.827116  | C         | -3.867053 | 1.921428  | -0.067347 |
| H         | 3.787188  | -1.301124 | 1.855875  | H         | -3.760520 | 2.109927  | 1.008372  |
| H         | 3.992876  | -2.730207 | 0.813538  | H         | -3.827476 | 2.869309  | -0.601111 |
| H         | 4.910167  | -1.252598 | 0.459955  | H         | -4.833273 | 1.445715  | -0.262679 |
| H         | -3.397041 | -1.642475 | -1.275028 | H         | 4.586514  | -0.470917 | 0.243790  |
| O         | 1.078713  | 1.704237  | -0.925818 | O         | -1.254948 | -2.033359 | 0.149097  |
| H         | 1.900010  | 2.110774  | -1.221119 | H         | -2.094731 | -2.487328 | 0.024860  |
| H         | 2.521888  | 0.475787  | 1.036574  | H         | -2.553487 | 0.097308  | 1.214364  |
| O         | 3.632058  | 0.858853  | -0.665791 | O         | -3.730403 | -0.961822 | -0.112391 |
| H         | 4.292804  | 1.158166  | -0.038122 | H         | -4.369578 | -0.908594 | 0.600743  |
| TS(O5-C6) |           |           |           | TS(O2-C1) |           |           |           |
| C         | 0.168309  | -0.195082 | -0.209640 | C         | 0.080572  | -0.207908 | -0.372677 |
| C         | 1.285024  | 0.827464  | -0.402197 | C         | 1.211845  | 0.731888  | -0.813166 |
| C         | 2.667128  | 0.273607  | -0.041521 | C         | 2.558493  | 0.076986  | -0.740157 |
| C         | -2.204905 | 0.273975  | 0.532893  | C         | -2.365675 | -0.237364 | 0.196275  |
| C         | -1.219779 | 0.379140  | -0.636136 | C         | -1.271728 | 0.498344  | -0.571465 |
| H         | 1.300248  | 1.138392  | -1.448086 | H         | 1.062530  | 0.926218  | -1.901975 |
| H         | 0.400404  | -1.066897 | -0.827551 | H         | 0.080366  | -1.102130 | -1.009947 |
| H         | -1.877433 | 0.966578  | 1.329446  | H         | -2.239560 | -0.000676 | 1.259767  |
| H         | -1.608416 | -0.235377 | -1.454128 | H         | -1.497874 | 0.440829  | -1.649987 |
| O         | -2.426959 | -1.017512 | 0.970069  | O         | -2.210456 | -1.636688 | -0.014895 |
| O         | -1.220112 | 1.701677  | -1.126833 | O         | -1.300760 | 1.838404  | -0.149952 |
| H         | -0.679020 | 2.241891  | -0.532986 | H         | -0.371796 | 2.125642  | 0.006317  |
| O         | 0.194806  | -0.571600 | 1.163065  | O         | 0.324428  | -0.567741 | 0.970116  |

|           |           |           |           |           |           |           |           |
|-----------|-----------|-----------|-----------|-----------|-----------|-----------|-----------|
| H         | -0.617185 | -1.077883 | 1.357075  | H         | -0.291724 | -1.277230 | 1.181626  |
| C         | -3.580988 | 0.541350  | 0.132605  | C         | -3.743552 | 0.211873  | -0.237072 |
| H         | -4.347467 | 0.513226  | 0.897602  | H         | -3.858232 | 1.277383  | -0.021569 |
| H         | -3.877707 | 0.795305  | -0.877985 | H         | -3.860941 | 0.035966  | -1.313707 |
| O         | -4.344206 | -1.473426 | -0.602946 | O         | -4.668988 | -0.584270 | 0.498964  |
| H         | -4.134738 | -1.835953 | -1.468295 | H         | -5.563241 | -0.370161 | 0.227664  |
| O         | 2.845970  | -0.891748 | -0.789714 | O         | 2.713843  | -1.145842 | -0.481215 |
| C         | 4.162513  | -1.408386 | -0.714016 | C         | 4.035184  | -1.620215 | -0.145033 |
| H         | 4.427058  | -1.652522 | 0.317185  | H         | 4.177348  | -1.381884 | 0.907975  |
| H         | 4.184791  | -2.309549 | -1.323847 | H         | 4.029570  | -2.690625 | -0.324314 |
| H         | 4.883428  | -0.683661 | -1.109989 | H         | 4.776559  | -1.117266 | -0.766626 |
| O         | 2.806661  | 0.064815  | 1.335441  | O         | 3.072270  | 0.838289  | 1.431313  |
| H         | 2.057266  | -0.483801 | 1.616753  | H         | 3.730018  | 1.501908  | 1.653128  |
| H         | -3.591269 | -1.694718 | 0.007270  | H         | -3.028472 | -2.052353 | 0.280672  |
| H         | 3.431757  | 1.017541  | -0.299526 | H         | 3.434484  | 0.689353  | -0.952294 |
| O         | 1.036410  | 1.992938  | 0.370569  | O         | 1.333915  | 1.870610  | -0.074234 |
| H         | 1.243916  | 1.773875  | 1.287928  | H         | 2.276110  | 1.371307  | 1.082279  |
| TS(O3-C2) |           |           |           | TS(O4-C3) |           |           |           |
| C         | -0.039571 | -0.390856 | -0.171716 | C         | 0.064215  | 0.179385  | -0.307707 |
| C         | 1.217148  | 0.236137  | -0.614690 | C         | 1.222584  | 0.912403  | 0.227933  |
| C         | 2.472231  | -0.563326 | -0.422533 | C         | 2.359415  | -0.123241 | 0.432223  |
| C         | -2.506671 | -0.297989 | 0.104997  | C         | -1.245269 | 0.160158  | 0.374354  |
| C         | -1.314597 | 0.300400  | -0.635299 | H         | 1.575119  | 1.607836  | -0.546432 |
| H         | 1.272788  | 1.090504  | -1.277460 | O         | 2.654411  | -0.667840 | -0.807220 |
| H         | -0.096428 | -1.453911 | -0.452395 | C         | 3.663429  | -1.660184 | -0.772236 |
| H         | -2.294651 | -0.271412 | 1.180764  | H         | 3.393156  | -2.462670 | -0.074877 |
| H         | -1.444908 | 0.111420  | -1.711082 | H         | 3.739583  | -2.069096 | -1.777176 |
| O         | -2.622352 | -1.630989 | -0.354367 | H         | 4.625510  | -1.227777 | -0.485683 |
| O         | -1.169437 | 1.685776  | -0.375357 | O         | 0.925593  | 1.533477  | 1.439360  |
| H         | -1.781299 | 2.182921  | -0.921567 | H         | 1.712217  | 2.014221  | 1.714372  |
| O         | 0.268336  | -0.188957 | 1.170675  | H         | 2.040666  | -0.904894 | 1.138444  |
| H         | 0.937122  | 1.457467  | 1.257970  | O         | 3.435174  | 0.598425  | 0.974053  |
| C         | -3.795052 | 0.457984  | -0.167296 | H         | 3.859742  | 0.090806  | 1.669062  |
| H         | -3.735060 | 1.465709  | 0.256601  | H         | 0.275303  | -0.434427 | -1.175271 |
| H         | -3.961394 | 0.517087  | -1.252332 | O         | -0.370342 | 1.632109  | -2.051072 |
| O         | -4.826654 | -0.294439 | 0.454675  | H         | -0.819729 | 1.385993  | -2.863769 |
| H         | -5.680379 | 0.087684  | 0.244207  | O         | -1.716240 | 1.406469  | 0.004593  |
| O         | 3.543729  | 0.322828  | -0.215454 | H         | -1.083334 | 1.759511  | -1.331087 |
| C         | 4.801257  | -0.335137 | -0.211748 | C         | -2.115936 | -1.003341 | -0.082099 |
| H         | 4.979141  | -0.823340 | -1.176960 | H         | -2.208351 | -0.969641 | -1.177364 |
| H         | 5.555741  | 0.432355  | -0.051841 | C         | -3.509067 | -0.886678 | 0.528556  |
| H         | 4.846776  | -1.079267 | 0.585343  | H         | -4.085691 | -1.791574 | 0.310033  |
| H         | -3.428985 | -1.992977 | 0.027478  | H         | -3.406996 | -0.810080 | 1.620921  |
| O         | 1.568752  | 1.942011  | 0.683998  | H         | -1.078655 | 0.069851  | 1.462182  |

|                                            |           |           |           |           |           |           |           |
|--------------------------------------------|-----------|-----------|-----------|-----------|-----------|-----------|-----------|
| H                                          | 2.454885  | 1.685226  | 0.968796  | O         | -1.426435 | -2.173285 | 0.337490  |
| H                                          | 2.619540  | -1.065698 | -1.401198 | H         | -1.898191 | -2.949924 | 0.026547  |
| O                                          | 2.373860  | -1.532297 | 0.545529  | O         | -4.212092 | 0.203661  | -0.011798 |
| H                                          | 1.658765  | -1.218504 | 1.155789  | H         | -3.597121 | 0.956717  | 0.000698  |
| TS(O5-C4)                                  |           |           |           | TS(O6-C5) |           |           |           |
| C                                          | 0.163269  | -0.098932 | -0.156727 | C         | 0.009494  | 0.875512  | -0.045865 |
| C                                          | 1.243934  | -0.000023 | 0.921152  | C         | 1.416902  | 0.931418  | -0.646244 |
| C                                          | 2.647155  | -0.163233 | 0.338424  | C         | 2.436837  | 0.031998  | 0.045249  |
| C                                          | -2.395498 | 0.080969  | -0.477351 | C         | -2.130117 | -0.496004 | -0.500832 |
| C                                          | -1.223163 | 0.090851  | 0.388373  | C         | -0.662165 | -0.497022 | -0.215778 |
| H                                          | 1.188141  | 0.992817  | 1.365834  | H         | 1.367503  | 0.675048  | -1.710182 |
| H                                          | 0.352867  | 0.628020  | -0.950328 | H         | 0.087179  | 1.075581  | 1.026744  |
| H                                          | -2.128247 | 0.048435  | -1.542589 | H         | -2.470103 | 0.201559  | -1.260821 |
| O                                          | -2.887649 | 1.314551  | -0.058454 | H         | -0.432677 | -1.122882 | 0.649647  |
| O                                          | 0.052586  | -1.426472 | -0.663621 | O         | -2.502501 | 1.145161  | 1.180834  |
| H                                          | 0.916333  | -1.689256 | -1.007407 | O         | -0.307429 | -1.165636 | -1.425662 |
| C                                          | -3.434058 | -1.009971 | -0.165404 | H         | 0.529092  | -1.618424 | -1.241535 |
| H                                          | -3.170119 | -1.956678 | -0.638416 | O         | -0.701379 | 1.917950  | -0.681039 |
| O                                          | 2.813409  | 0.816756  | -0.628081 | H         | -1.479704 | 2.078375  | -0.120791 |
| C                                          | 4.121337  | 0.896197  | -1.158163 | C         | -3.134937 | -1.441779 | -0.004518 |
| H                                          | 4.361433  | 0.010890  | -1.754786 | H         | -3.509688 | -2.066671 | -0.830114 |
| H                                          | 4.152014  | 1.773506  | -1.800296 | H         | -2.728247 | -2.102980 | 0.775318  |
| H                                          | 4.859359  | 1.011966  | -0.355128 | O         | -4.057267 | -0.511499 | 0.435052  |
| O                                          | 2.744135  | -1.469393 | -0.209598 | H         | -3.348679 | 0.489282  | 0.994875  |
| H                                          | 3.645023  | -1.796604 | -0.163379 | O         | 2.051860  | -1.304074 | -0.082420 |
| H                                          | -1.706122 | 2.177961  | 0.266223  | C         | 3.000382  | -2.218393 | 0.456294  |
| H                                          | 3.392418  | -0.055237 | 1.138625  | H         | 3.097394  | -2.077386 | 1.533188  |
| O                                          | 1.026803  | -0.941595 | 1.943659  | H         | 2.631176  | -3.219376 | 0.241378  |
| H                                          | 0.993199  | -1.812690 | 1.529472  | H         | 3.974395  | -2.076297 | -0.023114 |
| H                                          | -1.392163 | 0.019446  | 1.458078  | O         | 2.534223  | 0.335064  | 1.413000  |
| O                                          | -0.738307 | 2.284465  | 0.593847  | H         | 2.684175  | 1.286494  | 1.475728  |
| H                                          | -0.802985 | 2.626484  | 1.490451  | H         | -2.280556 | 1.112396  | 2.114899  |
| H                                          | -3.491187 | -1.147134 | 0.923231  | H         | 3.414982  | 0.179423  | -0.437437 |
| O                                          | -4.661780 | -0.575348 | -0.682180 | O         | 1.935497  | 2.236198  | -0.468074 |
| H                                          | -4.701388 | 0.369218  | -0.465986 | H         | 1.221348  | 2.846164  | -0.691145 |
| <b>Four numbered-ring closure reaction</b> |           |           |           |           |           |           |           |
| TS(O1-C3)                                  |           |           |           | TS(O2-C4) |           |           |           |
| C                                          | 0.335467  | 0.105012  | -0.029288 | C         | -0.252641 | -0.598789 | -0.044209 |
| C                                          | 1.446970  | 0.914561  | 0.571701  | C         | -1.250444 | -0.118410 | -1.097491 |
| C                                          | 2.610873  | -0.065597 | 0.459411  | C         | -2.670239 | -0.063035 | -0.529772 |
| C                                          | -2.209455 | -0.210593 | -0.016903 | C         | 2.315024  | -0.456374 | 0.084354  |
| C                                          | -1.006951 | 0.723857  | -0.089174 | C         | 1.068707  | -0.268076 | -0.673069 |
| H                                          | 1.231547  | 1.062871  | 1.632192  | H         | -1.281857 | -0.823384 | -1.946091 |
| H                                          | 0.554155  | -0.646221 | -0.776529 | H         | -0.403121 | 0.047659  | 0.824589  |

|           |           |           |           |           |           |           |           |
|-----------|-----------|-----------|-----------|-----------|-----------|-----------|-----------|
| H         | -2.366232 | -0.447918 | 1.039397  | H         | 2.477624  | -1.547488 | -0.030508 |
| H         | -0.952293 | 1.089636  | -1.143000 | O         | 2.164843  | -0.199183 | 1.455106  |
| O         | -1.897382 | -1.372429 | -0.757863 | O         | -0.273631 | -1.965675 | 0.324578  |
| O         | -1.225231 | 1.787259  | 0.788903  | H         | 0.003295  | -2.045890 | 1.243988  |
| H         | -0.547881 | 2.457096  | 0.632494  | C         | 3.556837  | 0.231726  | -0.481358 |
| O         | -0.417088 | -1.489055 | 1.780063  | H         | 3.690406  | -0.026138 | -1.533976 |
| H         | -0.755957 | -2.157635 | 1.174969  | H         | 3.421484  | 1.315692  | -0.395809 |
| C         | -3.453041 | 0.457599  | -0.576980 | O         | 4.701609  | -0.204759 | 0.204316  |
| H         | -3.723216 | 1.313576  | 0.046540  | H         | 4.538739  | -0.081072 | 1.145788  |
| H         | -3.261542 | 0.793229  | -1.604492 | O         | -2.607400 | 0.574759  | 0.713616  |
| O         | -4.454495 | -0.549506 | -0.560741 | C         | -3.877805 | 0.919163  | 1.231340  |
| H         | -5.271420 | -0.204737 | -0.926257 | H         | -4.507473 | 0.032583  | 1.343114  |
| O         | 3.034104  | 0.047072  | -0.907683 | H         | -3.713700 | 1.379078  | 2.204512  |
| C         | 4.033435  | -0.896714 | -1.235748 | H         | -4.377438 | 1.638439  | 0.572489  |
| H         | 3.673951  | -1.912748 | -1.054297 | O         | -3.222586 | -1.350280 | -0.425243 |
| H         | 4.271376  | -0.768103 | -2.290897 | H         | -2.564118 | -1.926379 | -0.017287 |
| H         | 4.937570  | -0.724016 | -0.638571 | H         | 1.774419  | 0.691926  | 1.497164  |
| O         | 2.001297  | -1.214265 | 0.765820  | H         | -3.321250 | 0.496450  | -1.209675 |
| H         | 0.553782  | -1.565235 | 1.700510  | O         | -0.691193 | 1.087564  | -1.440354 |
| H         | -2.734747 | -1.811021 | -0.950855 | O         | 0.962810  | 1.905606  | 0.141950  |
| H         | 3.471572  | 0.187360  | 1.100334  | H         | 1.407856  | 2.695711  | -0.176638 |
| O         | 1.500438  | 2.179777  | -0.057365 | H         | 1.122109  | -0.230685 | -1.757509 |
| H         | 2.042403  | 2.054279  | -0.848730 | H         | 0.120765  | 1.722008  | -0.494667 |
| TS(O3-C5) |           |           |           | TS(O4-C6) |           |           |           |
| C         | -0.196735 | 0.013809  | -0.703730 | C         | 0.249179  | -0.483745 | -0.251313 |
| C         | -0.978532 | -0.872720 | 0.274031  | C         | 1.052600  | 0.615023  | 0.467724  |
| C         | -2.359636 | -0.313840 | 0.601979  | C         | 2.533253  | 0.276583  | 0.533749  |
| C         | 1.890873  | 0.437114  | 0.255860  | C         | -2.209873 | -0.920109 | -0.785771 |
| C         | 1.266371  | -0.424425 | -0.827077 | C         | -1.087891 | 0.101130  | -0.734298 |
| H         | -0.441346 | -0.948304 | 1.229524  | H         | 0.680940  | 0.655708  | 1.498951  |
| H         | -0.724804 | -0.014810 | -1.662622 | H         | 0.808049  | -0.848130 | -1.120564 |
| H         | 1.387376  | 0.444947  | 1.217022  | H         | -1.946811 | -1.964792 | -1.009846 |
| H         | 1.655883  | -0.073865 | -1.792408 | H         | -0.912397 | 0.524985  | -1.734249 |
| O         | 2.077731  | 2.406804  | -0.448215 | O         | -3.230764 | -0.548156 | -1.685573 |
| O         | 1.538858  | -1.805783 | -0.664876 | O         | -1.630466 | 1.044283  | 0.144740  |
| H         | 2.443078  | -1.929588 | -0.350123 | H         | -3.084783 | 1.328635  | 0.762135  |
| O         | 0.008247  | 1.300550  | -0.220311 | O         | -0.005628 | -1.569199 | 0.641596  |
| H         | 1.061761  | 2.157362  | -0.544572 | H         | 0.840649  | -1.830273 | 1.024543  |
| C         | 3.400800  | 0.444350  | 0.358184  | C         | -2.707196 | -0.870210 | 0.628247  |
| H         | 3.866196  | 0.547621  | -0.621748 | H         | -3.713366 | -1.214908 | 0.827248  |
| O         | -2.899344 | 0.247833  | -0.557604 | H         | -1.993379 | -0.873737 | 1.439166  |
| C         | -4.238600 | 0.653335  | -0.420600 | O         | -3.897038 | 0.957524  | 1.195849  |
| H         | -4.327045 | 1.536832  | 0.221728  | H         | -4.662125 | 1.216520  | 0.674352  |
| H         | -4.603225 | 0.910125  | -1.413864 | O         | 3.021483  | 0.124033  | -0.758563 |

|           |           |           |           |           |           |           |           |
|-----------|-----------|-----------|-----------|-----------|-----------|-----------|-----------|
| H         | -4.856797 | -0.159054 | -0.013876 | C         | 4.426227  | 0.065018  | -0.844825 |
| O         | -2.240919 | 0.608372  | 1.655232  | H         | 4.820156  | -0.867994 | -0.423921 |
| H         | -3.101548 | 0.730550  | 2.061986  | H         | 4.685756  | 0.101801  | -1.901253 |
| H         | 2.456572  | 2.521761  | -1.326338 | H         | 4.887112  | 0.919806  | -0.334564 |
| H         | -2.993159 | -1.158631 | 0.914754  | O         | 2.643189  | -0.925817 | 1.282899  |
| O         | -1.192057 | -2.155126 | -0.283422 | H         | 3.548923  | -1.060662 | 1.569276  |
| H         | -0.325322 | -2.525607 | -0.484093 | H         | -3.269370 | 0.415385  | -1.673412 |
| H         | 3.757970  | 1.236684  | 1.014033  | H         | 3.075126  | 1.085724  | 1.042819  |
| O         | 3.756543  | -0.853701 | 0.835343  | O         | 0.936177  | 1.867502  | -0.156057 |
| H         | 3.644687  | -0.893343 | 1.789532  | H         | 0.002107  | 2.108423  | -0.040885 |
| TS(O6-C4) |           |           |           | TS(O5-C3) |           |           |           |
| C         | -2.350046 | 1.079273  | -0.438450 | C         | 2.559429  | 0.229135  | 0.209679  |
| C         | -1.397983 | 0.214629  | 0.374574  | C         | 3.025004  | -0.983789 | -0.594835 |
| C         | -3.281307 | 0.018874  | -1.008024 | C         | 0.314513  | 0.668309  | -0.349201 |
| H         | -4.206732 | 0.040214  | -0.415116 | C         | 1.138423  | 0.055130  | 0.768914  |
| O         | -2.548099 | -1.167590 | -0.827273 | H         | 2.244139  | -1.290055 | -1.311732 |
| H         | -2.643810 | -1.524099 | 0.607696  | H         | 3.286927  | 0.389786  | 1.019112  |
| O         | -2.349117 | -1.333857 | 1.573195  | H         | 0.544700  | 0.344546  | -1.356049 |
| H         | -1.637960 | -1.957915 | 1.758439  | H         | 1.017663  | 0.653285  | 1.673089  |
| H         | -1.722588 | 1.554444  | -1.209594 | O         | 0.416650  | 2.811991  | -0.419741 |
| O         | -3.024727 | 2.046894  | 0.316206  | O         | 0.657371  | -1.244230 | 1.084924  |
| H         | -2.435964 | 2.786114  | 0.490905  | H         | 0.650088  | -1.759606 | 0.268910  |
| C         | -0.149275 | -0.351334 | -0.284034 | O         | 2.346759  | 1.336500  | -0.577744 |
| H         | -0.164692 | -0.043011 | -1.336043 | H         | 1.384739  | 2.580622  | -0.389735 |
| H         | -1.298690 | 0.506464  | 1.414418  | C         | -1.161243 | 0.877674  | -0.132484 |
| O         | -0.068223 | -1.751884 | -0.191842 | H         | 0.140127  | 3.108581  | 0.454353  |
| H         | -0.857349 | -2.058786 | -0.673477 | O         | 3.409359  | -2.070734 | 0.230722  |
| H         | -3.544055 | 0.189184  | -2.057423 | H         | 2.777924  | -2.144613 | 0.952370  |
| C         | 1.062665  | 0.269862  | 0.393301  | H         | -1.564789 | 1.439171  | -0.979821 |
| H         | 1.112659  | -0.058757 | 1.440806  | C         | -1.901395 | -0.469142 | -0.105672 |
| C         | 2.372349  | -0.138767 | -0.276491 | H         | -1.694202 | -1.000462 | 0.830329  |
| H         | 2.313590  | 0.034725  | -1.365936 | O         | -1.393425 | 1.543123  | 1.088432  |
| O         | 3.344445  | 0.694388  | 0.269778  | H         | -2.347371 | 1.610523  | 1.202606  |
| C         | 4.633649  | 0.504885  | -0.292121 | O         | -1.470860 | -1.221249 | -1.211431 |
| H         | 5.285818  | 1.250579  | 0.157947  | H         | -1.878517 | -2.091618 | -1.193250 |
| H         | 5.004887  | -0.497099 | -0.071834 | O         | -3.256466 | -0.125701 | -0.159668 |
| H         | 4.601716  | 0.653285  | -1.377621 | C         | -4.138405 | -1.204085 | 0.084365  |
| O         | 0.851488  | 1.664441  | 0.297916  | H         | -5.136974 | -0.784701 | 0.188869  |
| H         | 1.679745  | 2.093883  | 0.542469  | H         | -4.146236 | -1.909353 | -0.753728 |
| O         | 2.701918  | -1.470408 | -0.008800 | H         | -3.868117 | -1.730344 | 1.007275  |
| H         | 1.911639  | -2.009636 | -0.151603 | H         | 3.896828  | -0.692760 | -1.181151 |
| TS(O4-C2) |           |           |           | TS(O3-C1) |           |           |           |
| C         | 0.121429  | 0.647146  | 1.222850  | C         | 1.215067  | 0.762701  | -0.373870 |
| C         | -1.176082 | 0.718141  | 0.445926  | C         | 0.054064  | 0.000614  | 0.296620  |

|                                            |           |           |           |           |           |           |           |
|--------------------------------------------|-----------|-----------|-----------|-----------|-----------|-----------|-----------|
| C                                          | 2.435245  | 0.140519  | 0.107745  | C         | -1.250785 | 0.313912  | -0.442033 |
| C                                          | 1.121056  | 0.922543  | 0.104703  | C         | 2.420832  | 0.183967  | 0.287779  |
| H                                          | 1.357131  | 1.996560  | 0.158224  | H         | -0.058687 | 0.395528  | 1.330477  |
| O                                          | 3.023703  | 0.309759  | -1.173121 | H         | 1.248634  | 0.416484  | -1.419645 |
| O                                          | 0.378173  | 0.612833  | -1.052040 | O         | 1.292392  | 2.164202  | -0.280410 |
| H                                          | -0.529414 | 1.884353  | -1.321801 | H         | 0.381099  | 2.467747  | -0.410425 |
| H                                          | 2.275779  | 0.343991  | -1.789640 | O         | -1.484686 | 1.723097  | -0.491690 |
| O                                          | -1.322476 | 2.391218  | -0.978455 | H         | -1.968352 | 1.934920  | 0.319131  |
| H                                          | -2.065537 | 2.097407  | -1.519148 | O         | 0.406813  | -1.308893 | 0.237586  |
| H                                          | 0.183388  | -0.386412 | 1.600397  | O         | 2.687034  | -2.229284 | -0.487334 |
| O                                          | 0.229511  | 1.573807  | 2.266138  | H         | 2.683172  | -2.860450 | -1.208426 |
| H                                          | -0.213939 | 1.245384  | 3.051969  | H         | 2.316106  | -0.466746 | 1.156024  |
| C                                          | 2.265014  | -1.356055 | 0.365056  | H         | 1.725397  | -2.009302 | -0.274378 |
| H                                          | 1.434786  | -1.731485 | -0.252912 | O         | 3.566945  | 0.505394  | -0.112854 |
| H                                          | 2.038128  | -1.549874 | 1.416916  | C         | 4.711248  | -0.145232 | 0.494285  |
| O                                          | 3.458062  | -2.044657 | 0.074940  | H         | 4.732856  | -1.157713 | 0.093396  |
| H                                          | 3.815290  | -1.632915 | -0.721379 | H         | 5.575513  | 0.441434  | 0.201193  |
| H                                          | 3.136775  | 0.556346  | 0.836128  | H         | 4.587090  | -0.153577 | 1.576348  |
| C                                          | -1.749081 | -0.531782 | -0.198514 | H         | -1.140601 | -0.035838 | -1.474747 |
| H                                          | -1.019875 | -1.350009 | -0.115806 | C         | -2.430622 | -0.395204 | 0.208961  |
| O                                          | -2.877962 | -0.796426 | 0.559010  | H         | -2.110239 | -1.406628 | 0.480982  |
| C                                          | -3.466006 | -2.059863 | 0.272663  | C         | -3.635107 | -0.453495 | -0.712835 |
| H                                          | -4.292223 | -2.182151 | 0.969067  | H         | -3.849734 | 0.550363  | -1.097600 |
| H                                          | -3.833444 | -2.084893 | -0.754266 | H         | -3.421744 | -1.127269 | -1.549605 |
| H                                          | -2.736884 | -2.863419 | 0.423140  | O         | -2.754833 | 0.357434  | 1.372066  |
| H                                          | -1.921642 | 1.410391  | 0.819660  | H         | -3.620045 | 0.055733  | 1.669938  |
| O                                          | -2.099274 | -0.340843 | -1.535920 | O         | -4.719814 | -0.937740 | 0.071437  |
| H                                          | -1.255665 | -0.282688 | -2.007530 | H         | -5.539458 | -0.841950 | -0.416517 |
| <b>Five numbered-ring closure reaction</b> |           |           |           |           |           |           |           |
| TS(O1-C4)                                  |           |           |           | TS(O2-C5) |           |           |           |
| C                                          | -0.009824 | 1.066461  | -1.024597 | C         | 0.107232  | -0.910303 | 0.392016  |
| C                                          | -1.146894 | 0.733948  | 0.032987  | C         | 0.932849  | -0.146323 | -0.685860 |
| C                                          | -2.060344 | -0.397462 | -0.532098 | C         | 2.045788  | 0.672254  | -0.017840 |
| C                                          | 2.230078  | -0.064064 | -0.404344 | C         | -1.988025 | 0.172417  | -0.418486 |
| C                                          | 0.939239  | -0.042046 | -1.087653 | C         | -1.264446 | -1.121146 | -0.272008 |
| H                                          | -0.671262 | 0.403653  | 0.960494  | H         | 1.424372  | -0.899248 | -1.323431 |
| H                                          | -0.510751 | 1.151076  | -2.000785 | H         | 0.536850  | -1.890343 | 0.625180  |
| H                                          | 2.791791  | 0.710174  | -0.970270 | H         | -2.272443 | 0.454067  | -1.427455 |
| H                                          | 0.754653  | -0.806939 | -1.832102 | H         | -1.882424 | -1.753868 | 0.375390  |
| O                                          | 2.888847  | -1.287119 | -0.554685 | O         | -1.067837 | 2.199193  | 0.078808  |
| O                                          | 0.411805  | -2.047456 | 0.165656  | O         | -1.120934 | -1.772857 | -1.503426 |
| H                                          | 0.087071  | -2.317180 | 1.028975  | H         | -0.681429 | -1.127755 | -2.081345 |
| O                                          | 0.639945  | 2.249912  | -0.653218 | O         | -0.085970 | -0.161289 | 1.581939  |
| H                                          | -0.023567 | 2.807079  | -0.222836 | H         | 0.770177  | -0.133226 | 2.028475  |



|           |           |           |           |           |           |           |           |
|-----------|-----------|-----------|-----------|-----------|-----------|-----------|-----------|
| O         | -1.795584 | 1.947305  | 0.319879  | O         | 0.080510  | 0.649306  | -1.418861 |
| H         | -2.527366 | 2.060140  | -0.298814 | H         | -0.443001 | 1.754125  | -0.609701 |
| C         | 2.275493  | 0.380099  | 1.075414  | C         | -2.937559 | 0.575506  | 0.685269  |
| H         | 1.873272  | 1.382455  | 1.197054  | H         | -3.303796 | 1.588786  | 0.546360  |
| O         | -2.661484 | -1.071223 | 0.573499  | O         | 2.657299  | -0.011031 | 1.070463  |
| C         | -3.637826 | -0.336358 | 1.275440  | C         | 3.423478  | -1.154534 | 0.714861  |
| H         | -4.378808 | 0.092017  | 0.586373  | H         | 2.785585  | -1.984285 | 0.392849  |
| H         | -4.146097 | -1.034422 | 1.939645  | H         | 4.129006  | -0.916596 | -0.082605 |
| H         | -3.203899 | 0.472720  | 1.873272  | H         | 3.968504  | -1.451326 | 1.609397  |
| O         | -1.361384 | -1.247770 | -1.274438 | O         | 2.972733  | 1.015722  | -0.998689 |
| H         | -0.453501 | -1.857475 | -0.453905 | H         | 3.479049  | 1.775336  | -0.699010 |
| H         | 2.229580  | -1.957992 | -0.291343 | H         | -0.673384 | 1.983010  | 0.931507  |
| H         | -2.877251 | 0.104879  | -1.105971 | H         | 1.611860  | 1.565834  | 0.440815  |
| H         | 1.674573  | -0.341069 | 1.642260  | H         | -2.467731 | 0.468261  | 1.661065  |
| O         | 3.608504  | 0.398820  | 1.506118  | O         | -3.973297 | -0.396324 | 0.603108  |
| H         | 3.996824  | -0.452332 | 1.274585  | H         | -4.597131 | -0.141756 | -0.081960 |
| TS(O3-C6) |           |           |           | TS(O6-C3) |           |           |           |
| C         | 0.528895  | -0.196144 | -0.992504 | C         | 0.248550  | 0.207916  | -0.415447 |
| C         | -0.611854 | 0.593044  | -0.346093 | C         | -1.055437 | 0.583217  | 0.226972  |
| C         | -1.781190 | -0.291599 | 0.077703  | C         | -2.143336 | -0.347809 | -0.348217 |
| C         | 1.759701  | -0.773677 | 1.074871  | C         | 2.474651  | -0.889780 | -0.593376 |
| C         | 1.066647  | -1.373172 | -0.151121 | C         | 1.128645  | -0.827725 | 0.155940  |
| H         | -0.260725 | 1.078912  | 0.572988  | H         | -1.015335 | 0.422705  | 1.306882  |
| H         | 0.130263  | -0.622913 | -1.923706 | H         | 0.230072  | 0.279018  | -1.499733 |
| H         | 2.460168  | -1.554691 | 1.428967  | H         | 2.293108  | -1.259863 | -1.607559 |
| O         | 1.649094  | 0.566436  | -1.244746 | H         | 0.589164  | -1.764729 | -0.076651 |
| H         | 1.779201  | 1.775836  | -0.575039 | O         | 3.340694  | -1.794871 | 0.030019  |
| O         | -1.016959 | 1.562745  | -1.286058 | O         | 1.299156  | -0.739109 | 1.534707  |
| H         | -1.887241 | 1.873223  | -1.013500 | H         | 1.292032  | 0.235359  | 1.723222  |
| C         | 2.692553  | 0.335077  | 0.741746  | O         | 1.122361  | 1.772296  | 1.083842  |
| H         | 2.998652  | 0.941515  | 1.584912  | H         | 0.469035  | 2.458557  | 1.238015  |
| O         | -2.818918 | 0.593261  | 0.422457  | O         | -1.385192 | 1.905084  | -0.115618 |
| C         | -3.990319 | -0.042946 | 0.882704  | H         | -2.310800 | 2.028286  | 0.125404  |
| H         | -3.759676 | -0.738254 | 1.700559  | C         | 3.047885  | 0.535808  | -0.663420 |
| H         | -4.654752 | 0.733964  | 1.256388  | H         | 3.429767  | 0.802206  | 0.331217  |
| H         | -4.494990 | -0.580937 | 0.074485  | H         | 3.874536  | 0.554093  | -1.378614 |
| O         | -2.140372 | -1.140917 | -0.979539 | O         | 2.038248  | 1.422255  | -1.059631 |
| H         | -2.608566 | -1.906373 | -0.639195 | H         | 1.679721  | 1.840021  | -0.132862 |
| H         | -1.505978 | -0.877758 | 0.965637  | O         | -3.334001 | 0.113283  | 0.220763  |
| H         | 3.476166  | 0.129905  | 0.025705  | C         | -4.497228 | -0.520189 | -0.275911 |
| O         | 2.111611  | 2.327185  | 0.261081  | H         | -5.351713 | 0.010694  | 0.138232  |
| H         | 1.328494  | 2.654262  | 0.716289  | H         | -4.533528 | -0.464800 | -1.370739 |
| H         | 0.314014  | -2.098686 | 0.163343  | H         | -4.544823 | -1.565037 | 0.045987  |
| O         | 2.043262  | -2.041518 | -0.915036 | O         | -1.835395 | -1.662023 | 0.008173  |

|                                           |           |           |           |                  |           |           |           |
|-------------------------------------------|-----------|-----------|-----------|------------------|-----------|-----------|-----------|
| H                                         | 2.385789  | -1.376440 | -1.529995 | H                | -2.348881 | -2.280785 | -0.517657 |
| O                                         | 0.805751  | -0.455734 | 2.064430  | H                | 3.260593  | -1.639785 | 0.980443  |
| H                                         | 1.244827  | -0.226727 | 2.887620  | H                | -2.202287 | -0.239897 | -1.442879 |
| <b>TS(O5-C2)</b>                          |           |           |           | <b>TS(O4-C1)</b> |           |           |           |
| C                                         | -0.019479 | 0.994889  | 0.421442  | C                | -0.072788 | 1.148188  | 0.866549  |
| C                                         | 0.689681  | -0.165332 | -0.214713 | C                | 0.885928  | 1.203464  | -0.336057 |
| C                                         | 2.147048  | -0.407700 | 0.162875  | C                | 2.033375  | 0.253008  | -0.227596 |
| C                                         | -2.059802 | -0.403031 | 0.421696  | C                | -2.192784 | -0.243988 | 0.402603  |
| C                                         | -1.513472 | 0.985445  | 0.128213  | C                | -0.770183 | -0.233173 | 0.965404  |
| H                                         | 0.499358  | -0.349107 | -1.267288 | H                | 0.358304  | 1.035388  | -1.274085 |
| H                                         | 0.149461  | 0.994805  | 1.506010  | H                | 0.547145  | 1.289604  | 1.768344  |
| H                                         | -2.061632 | -0.560482 | 1.511004  | H                | -2.737847 | 0.625522  | 0.786539  |
| H                                         | -1.636691 | 1.190270  | -0.943469 | H                | -0.879557 | -0.474562 | 2.031456  |
| O                                         | -1.199653 | -1.308440 | -0.227857 | O                | -2.796150 | -1.435702 | 0.866968  |
| O                                         | -2.185791 | 1.939223  | 0.911238  | O                | 0.027139  | -1.173792 | 0.318023  |
| H                                         | -1.934172 | 2.815102  | 0.603544  | H                | 0.863454  | -1.422696 | 0.948665  |
| O                                         | 0.494921  | 2.175180  | -0.176669 | O                | -1.008330 | 2.194760  | 0.751689  |
| H                                         | 1.458599  | 2.118371  | -0.228857 | H                | -0.542843 | 3.016289  | 0.564073  |
| O                                         | 0.515402  | -1.946829 | 1.206094  | O                | 1.485863  | 2.495486  | -0.422346 |
| H                                         | 0.396210  | -1.764004 | 2.141886  | H                | 1.876575  | 2.720311  | 0.431077  |
| C                                         | -3.472484 | -0.590033 | -0.120163 | C                | -2.222614 | -0.204870 | -1.115545 |
| H                                         | -3.868486 | -1.545028 | 0.244211  | H                | -1.853902 | 0.764074  | -1.471570 |
| H                                         | -4.113619 | 0.218905  | 0.234416  | H                | -1.598827 | -1.016647 | -1.500168 |
| O                                         | -3.471986 | -0.547635 | -1.529935 | O                | -3.586457 | -0.377938 | -1.497114 |
| H                                         | -2.807923 | -1.184691 | -1.817261 | H                | -3.625663 | -0.670822 | -2.408734 |
| O                                         | 2.784182  | 0.631351  | -0.534418 | O                | 2.313242  | -0.503811 | -1.186814 |
| C                                         | 4.205971  | 0.597640  | -0.421629 | C                | 3.479620  | -1.375042 | -1.056879 |
| H                                         | 4.603093  | -0.293068 | -0.907009 | H                | 3.452690  | -1.782061 | -0.043784 |
| H                                         | 4.573599  | 1.494558  | -0.915331 | H                | 3.344076  | -2.137718 | -1.816496 |
| H                                         | 4.501956  | 0.605939  | 0.632782  | H                | 4.364882  | -0.774503 | -1.262404 |
| O                                         | 2.624785  | -1.624724 | -0.279979 | O                | 2.104559  | -1.397533 | 1.524748  |
| H                                         | 2.114802  | -2.277942 | 0.229086  | H                | 2.149320  | -1.653512 | 2.447060  |
| H                                         | -0.533492 | -1.803838 | 0.519931  | H                | -3.607430 | -1.544805 | 0.360290  |
| H                                         | 2.299267  | -0.276062 | 1.242232  | H                | 2.727369  | 0.328848  | 0.607624  |
| <b>Six numbered-ring closure reaction</b> |           |           |           |                  |           |           |           |
| <b>TS(O1-C5)</b>                          |           |           |           | <b>TS(O2-C6)</b> |           |           |           |
| C                                         | 0.145989  | 1.513263  | -0.245028 | C                | -0.043046 | -1.187041 | -0.492807 |
| C                                         | -1.084298 | 0.892273  | 0.412164  | C                | 0.404637  | 0.278459  | -0.464891 |
| C                                         | -1.687087 | -0.219108 | -0.451423 | C                | 1.940720  | 0.440885  | -0.551397 |
| C                                         | 1.581987  | -0.519180 | -0.725577 | C                | -2.309273 | -0.488212 | 0.480925  |
| C                                         | 1.462410  | 0.777648  | 0.005773  | C                | -1.569043 | -1.305268 | -0.591189 |
| H                                         | -0.827737 | 0.493457  | 1.400649  | H                | 0.009892  | 0.751172  | -1.383749 |
| H                                         | -0.017528 | 1.565118  | -1.333416 | H                | 0.378141  | -1.676576 | -1.388006 |
| H                                         | 1.116813  | -0.560970 | -1.705877 | H                | -1.826041 | -2.355551 | -0.416844 |

|           |           |           |           |                 |           |           |           |
|-----------|-----------|-----------|-----------|-----------------|-----------|-----------|-----------|
| H         | 1.657881  | 0.659564  | 1.072025  | O               | -2.070096 | -0.842413 | -1.830491 |
| O         | 0.586736  | -1.739473 | 1.107751  | H               | -1.722503 | -1.388418 | -2.540073 |
| O         | 2.516891  | 1.484204  | -0.636631 | O               | 0.310802  | -1.894876 | 0.674266  |
| H         | 2.309481  | 2.424462  | -0.543256 | H               | 1.243724  | -1.694090 | 0.838649  |
| O         | 0.394499  | 2.811192  | 0.254510  | O               | -0.083587 | 0.912047  | 0.669894  |
| H         | -0.459934 | 3.222621  | 0.435807  | H               | -0.613385 | 2.100240  | 0.239522  |
| O         | -2.025029 | 1.944783  | 0.542197  | C               | -2.522810 | 0.927056  | 0.218010  |
| H         | -2.859591 | 1.544549  | 0.810711  | H               | -2.784569 | 1.237403  | -0.784676 |
| C         | 2.627909  | -1.501308 | -0.472448 | H               | -2.856450 | 1.521402  | 1.057955  |
| H         | 2.304030  | -2.471288 | -0.880319 | O               | -1.295331 | 2.788270  | -0.198504 |
| H         | 3.408723  | -1.130115 | -1.172490 | H               | -1.383349 | 3.546702  | 0.384050  |
| O         | 3.124668  | -1.556934 | 0.806126  | O               | 2.563004  | -0.594331 | 0.195153  |
| H         | 2.308333  | -1.767336 | 1.319162  | C               | 3.977090  | -0.540718 | 0.159162  |
| O         | -2.799696 | -0.666040 | 0.298202  | H               | 4.345102  | -1.390986 | 0.731198  |
| C         | -3.593304 | -1.610117 | -0.397149 | H               | 4.335717  | -0.615589 | -0.874500 |
| H         | -3.012967 | -2.504073 | -0.633455 | H               | 4.340728  | 0.389903  | 0.598311  |
| H         | -4.425039 | -1.870434 | 0.255130  | O               | 2.301696  | 1.690291  | -0.076270 |
| H         | -3.981653 | -1.176691 | -1.326957 | H               | 1.673166  | 1.863642  | 0.644169  |
| O         | -0.807508 | -1.225459 | -0.767227 | H               | 2.293903  | 0.368315  | -1.588446 |
| H         | -0.297947 | -1.576367 | 0.143680  | H               | -3.401868 | -0.725103 | 0.323292  |
| H         | 0.187097  | -1.503717 | 1.948981  | O               | -2.008398 | -0.808552 | 1.783861  |
| H         | -2.056086 | 0.232202  | -1.387673 | H               | -1.046580 | -0.686915 | 1.868994  |
| TS(O6-C2) |           |           |           | TS(O5-C1) (TS3) |           |           |           |
| C         | -0.302775 | -1.210661 | -0.383218 | C               | 0.301853  | 1.376287  | -0.430681 |
| C         | 0.410272  | 0.048306  | -0.711040 | C               | -0.955965 | 1.189132  | 0.438938  |
| C         | 1.900360  | 0.230808  | -0.679072 | C               | -1.930705 | 0.172127  | -0.072236 |
| C         | -2.496599 | 0.066167  | 0.366831  | C               | 1.285837  | -0.937518 | -0.317707 |
| C         | -1.847095 | -1.032378 | -0.492189 | C               | 1.482715  | 0.530955  | 0.036911  |
| H         | 0.003015  | 0.533405  | -1.590209 | H               | -0.691163 | 0.954915  | 1.472318  |
| H         | -0.042109 | -1.826914 | -1.269598 | H               | 0.072689  | 1.145895  | -1.481364 |
| H         | -2.260233 | -1.989405 | -0.160392 | H               | 1.115714  | -1.004516 | -1.405885 |
| O         | -2.188149 | -0.746630 | -1.842330 | H               | 1.565836  | 0.618098  | 1.125779  |
| H         | -2.275827 | -1.567358 | -2.331879 | O               | 0.165858  | -1.390946 | 0.373091  |
| O         | 0.093567  | -1.891125 | 0.748200  | O               | 2.635491  | 1.093562  | -0.580527 |
| H         | 0.345594  | -1.183133 | 1.379411  | H               | 3.398111  | 0.738509  | -0.109573 |
| O         | 0.349497  | 0.566092  | 1.505777  | O               | 0.621681  | 2.750513  | -0.307016 |
| H         | 1.208098  | 0.823299  | 1.850246  | H               | 1.561877  | 2.834953  | -0.511856 |
| C         | -2.190895 | 1.486148  | -0.117906 | O               | -1.791197 | 2.334369  | 0.368045  |
| H         | -2.598876 | 1.617708  | -1.121907 | H               | -1.216779 | 3.081327  | 0.144651  |
| H         | -2.699973 | 2.179259  | 0.562005  | C               | 2.554625  | -1.741351 | -0.017651 |
| O         | -0.813994 | 1.808260  | -0.172474 | H               | 2.249219  | -2.765721 | 0.209080  |
| H         | -0.352459 | 1.562507  | 0.708689  | H               | 3.215137  | -1.744937 | -0.892429 |
| O         | 2.523644  | -0.482422 | 0.326268  | O               | 3.242982  | -1.152066 | 1.088954  |
| C         | 3.926899  | -0.561569 | 0.175810  | H               | 3.841227  | -1.796088 | 1.471191  |

|   |           |           |           |   |           |           |           |
|---|-----------|-----------|-----------|---|-----------|-----------|-----------|
| H | 4.285921  | -1.251278 | 0.936235  | O | -2.596745 | -0.462540 | 0.774941  |
| H | 4.195316  | -0.951269 | -0.814602 | C | -3.710880 | -1.292965 | 0.325201  |
| H | 4.400701  | 0.413452  | 0.328455  | H | -3.333949 | -1.895006 | -0.502844 |
| O | 2.180288  | 1.599818  | -0.654205 | H | -3.980225 | -1.888895 | 1.190843  |
| H | 3.002044  | 1.772762  | -1.119746 | H | -4.523650 | -0.624202 | 0.045430  |
| H | 2.207611  | -0.194499 | -1.659041 | O | -1.467865 | -1.871013 | -1.326512 |
| H | -3.574551 | -0.065989 | 0.223444  | H | -1.168251 | -2.249442 | -2.153860 |
| O | -2.258702 | -0.122064 | 1.736800  | H | -0.530915 | -1.755028 | -0.387874 |
| H | -1.334488 | 0.111097  | 1.939299  | H | -2.221394 | 0.155108  | -1.118066 |

**Table S3** The XYZ coordinates of all TSs from glucose to MDGP catalyzed by  $[\text{Al}(\text{CH}_3\text{O})_2(\text{CH}_3\text{OH})_2]^+$

| TS1' |           |           |           | TS2' |           |           |           |
|------|-----------|-----------|-----------|------|-----------|-----------|-----------|
| C    | 3.163013  | 1.221906  | -0.089442 | C    | 2.990464  | -1.240172 | 0.264110  |
| C    | 1.750976  | 1.734562  | 0.158504  | C    | 1.636576  | -1.885766 | -0.018556 |
| C    | 0.729923  | 0.757484  | -0.415017 | C    | 0.465587  | -1.118120 | 0.554069  |
| C    | 2.253086  | -1.094279 | -0.199118 | C    | 2.190653  | 1.155020  | 0.136258  |
| C    | 3.296892  | -0.191894 | 0.446248  | C    | 3.158868  | 0.118229  | -0.409076 |
| H    | 1.586401  | 1.813786  | 1.242591  | H    | 1.495275  | -2.003323 | -1.099064 |
| H    | 3.350646  | 1.213772  | -1.173315 | H    | 3.112534  | -1.122993 | 1.351253  |
| H    | 2.394530  | -1.108745 | -1.288194 | H    | 2.303816  | 1.237039  | 1.224493  |
| H    | 3.120062  | -0.173211 | 1.531878  | H    | 2.971436  | -0.004138 | -1.487404 |
| H    | 0.810530  | 0.726560  | -1.510107 | H    | 0.567380  | -0.749588 | 1.581591  |
| O    | 0.953664  | -0.558150 | 0.108782  | O    | 0.877774  | 0.655305  | -0.176960 |
| O    | 4.560321  | -0.741539 | 0.159972  | O    | 4.455294  | 0.617402  | -0.191234 |
| H    | 5.237083  | -0.116665 | 0.446684  | H    | 5.087459  | -0.083685 | -0.392423 |
| O    | 4.124718  | 2.002861  | 0.574525  | O    | 4.015464  | -2.047286 | -0.262708 |
| H    | 4.113828  | 2.894527  | 0.210999  | H    | 3.990502  | -2.910077 | 0.165161  |
| O    | 1.652473  | 2.985336  | -0.475522 | O    | 1.658206  | -3.135105 | 0.644764  |
| H    | 0.847370  | 3.433404  | -0.200841 | H    | 0.990043  | -3.720995 | 0.275784  |
| C    | 2.312162  | -2.528885 | 0.317031  | C    | 2.394974  | 2.541419  | -0.477250 |
| H    | 2.409860  | -2.522017 | 1.410576  | H    | 2.527496  | 2.442070  | -1.563444 |
| H    | 1.374627  | -3.035474 | 0.066582  | H    | 1.495277  | 3.137340  | -0.299357 |
| O    | 3.336077  | -3.252523 | -0.304233 | O    | 3.456615  | 3.220531  | 0.129116  |
| H    | 4.173410  | -2.806093 | -0.128441 | H    | 4.259531  | 2.701459  | 0.001196  |
| O    | -0.562045 | 1.126804  | -0.069383 | O    | -0.682024 | -1.320575 | 0.086849  |
| H    | -0.989941 | 1.199867  | 1.052550  | H    | -0.795317 | 0.485226  | -1.694200 |
| Al   | -2.265570 | 0.211715  | -0.161468 | Al   | -2.192413 | -0.151671 | 0.230134  |
| C    | -2.856291 | 1.362837  | 2.576427  | C    | -2.309185 | -0.425922 | -2.663088 |
| H    | -3.860128 | 0.937874  | 2.521112  | H    | -3.378288 | -0.488597 | -2.474349 |
| H    | -2.413741 | 1.117569  | 3.541340  | H    | -2.117064 | 0.084288  | -3.604100 |
| H    | -2.925380 | 2.446001  | 2.467901  | H    | -1.871518 | -1.423867 | -2.652639 |
| O    | -2.053449 | 0.810137  | 1.539505  | O    | -1.751199 | 0.362895  | -1.578629 |
| C    | -1.736811 | -2.521980 | -1.164256 | C    | -1.641883 | 2.004624  | 2.097571  |
| H    | -1.092261 | -2.467942 | -2.040731 | H    | -1.231086 | 1.743272  | 3.074519  |
| H    | -2.772815 | -2.387252 | -1.467296 | H    | -2.729942 | 2.060625  | 2.185078  |
| H    | -1.611080 | -3.472885 | -0.650039 | H    | -1.262849 | 2.988923  | 1.810979  |
| C    | -2.583997 | 1.667478  | -2.605680 | C    | -3.370275 | -2.753652 | 0.576122  |
| H    | -1.594161 | 2.086555  | -2.394683 | H    | -3.891755 | -3.278624 | -0.228023 |
| H    | -3.299132 | 2.489665  | -2.675140 | H    | -3.875935 | -2.979791 | 1.517575  |
| H    | -2.549473 | 1.158710  | -3.571600 | H    | -2.345720 | -3.135165 | 0.632110  |
| C    | -4.321054 | -1.601052 | 1.235624  | C    | -3.847582 | 2.387357  | -0.391176 |
| H    | -5.231448 | -1.265694 | 1.729626  | H    | -4.172674 | 2.389303  | -1.431329 |

|      |           |           |           |      |           |           |           |
|------|-----------|-----------|-----------|------|-----------|-----------|-----------|
| H    | -4.465272 | -2.582850 | 0.785993  | H    | -4.545908 | 2.941896  | 0.233855  |
| H    | -3.498505 | -1.632074 | 1.947529  | H    | -2.854432 | 2.824836  | -0.313049 |
| O    | -1.410647 | -1.449246 | -0.251599 | O    | -1.250658 | 1.037088  | 1.132879  |
| O    | -2.993072 | 0.760684  | -1.602574 | O    | -3.400750 | -1.365109 | 0.333877  |
| O    | -3.941639 | -0.648949 | 0.222588  | O    | -3.733873 | 1.038887  | 0.090630  |
| H    | -0.426777 | -1.354495 | -0.086851 | H    | 0.167082  | 1.084912  | 0.393260  |
| H    | -4.614440 | -0.465564 | -0.447446 | H    | -4.561945 | 0.540993  | 0.118203  |
| TS3' |           |           |           | TS4' |           |           |           |
| C    | -1.619740 | -1.302812 | -0.782266 | C    | 2.593919  | -0.821138 | 0.990821  |
| C    | -0.816684 | -1.248373 | 0.526876  | C    | 2.350543  | -2.005410 | 0.020789  |
| C    | 0.342012  | -2.226072 | 0.500117  | C    | 1.557608  | -1.683105 | -1.175832 |
| C    | -3.226216 | 0.476689  | 0.145111  | C    | 2.115335  | 1.471169  | -0.000360 |
| C    | -2.380982 | 0.007515  | -1.036776 | C    | 3.198269  | 0.438607  | 0.332921  |
| H    | -0.436184 | -0.235692 | 0.697440  | H    | 3.349060  | -2.252414 | -0.394482 |
| H    | -0.897059 | -1.396205 | -1.598400 | H    | 1.627642  | -0.586012 | 1.443856  |
| H    | -2.595204 | 0.568141  | 1.039131  | H    | 1.484806  | 1.618215  | 0.885359  |
| H    | -3.054967 | -0.158922 | -1.885166 | H    | 3.717478  | 0.175964  | -0.598103 |
| H    | 0.251232  | -3.109995 | -0.137249 | H    | 1.868481  | -0.877437 | -1.837136 |
| O    | -4.189082 | -0.549591 | 0.309751  | O    | 1.337667  | 0.950182  | -1.059063 |
| O    | -1.436729 | 1.039389  | -1.335492 | O    | 4.126254  | 0.971271  | 1.257668  |
| H    | -1.039961 | 0.854682  | -2.192284 | H    | 4.718724  | 1.557210  | 0.772079  |
| O    | -2.419905 | -2.443332 | -0.838024 | O    | 3.456884  | -1.392862 | 1.946126  |
| H    | -3.160918 | -2.317659 | -0.228448 | H    | 4.085206  | -0.711409 | 2.222472  |
| O    | -1.665337 | -1.662324 | 1.576514  | O    | 1.782748  | -3.084650 | 0.687565  |
| H    | -1.207855 | -1.615713 | 2.422190  | H    | 2.298213  | -3.214735 | 1.494686  |
| C    | -3.879979 | 1.838047  | -0.093527 | C    | 2.744676  | 2.813386  | -0.361064 |
| H    | -4.381063 | 1.849711  | -1.068694 | H    | 2.020258  | 3.385538  | -0.947512 |
| H    | -4.641016 | 2.000248  | 0.672906  | H    | 2.981175  | 3.366634  | 0.553878  |
| O    | -2.944067 | 2.889850  | 0.031599  | O    | 3.932768  | 2.562960  | -1.104173 |
| H    | -2.348270 | 2.815705  | -0.719548 | H    | 4.238308  | 3.375268  | -1.514192 |
| O    | 1.187793  | -2.268989 | 1.424077  | O    | -0.494951 | -0.870429 | 0.618130  |
| H    | 1.489726  | -1.222127 | 1.717101  | H    | 0.380160  | 1.090479  | -0.846003 |
| Al   | 2.239015  | 0.327767  | -0.126585 | C    | -0.255867 | -2.053826 | -2.622652 |
| C    | 2.472282  | 0.680723  | 2.721229  | H    | -0.263005 | -2.935370 | -3.258117 |
| H    | 3.121934  | 1.489402  | 2.380110  | H    | 0.166386  | -1.186889 | -3.130218 |
| H    | 1.663654  | 1.092039  | 3.325940  | H    | -1.242428 | -1.847105 | -2.204592 |
| H    | 3.062595  | -0.012354 | 3.320059  | O    | 0.574467  | -2.389092 | -1.473413 |
| O    | 1.920616  | -0.011381 | 1.591858  | H    | -0.504805 | -1.828690 | 0.693924  |
| C    | 1.844551  | -1.677361 | -2.068072 | Al   | -1.998128 | -0.039364 | 0.113045  |
| H    | 2.386047  | -2.587747 | -1.800275 | C    | -4.114882 | -1.467467 | -1.289993 |
| H    | 2.506302  | -1.031343 | -2.650489 | H    | -4.866165 | -1.470350 | -0.487707 |
| H    | 0.985345  | -1.944624 | -2.686790 | H    | -4.395629 | -0.704546 | -2.032979 |
| C    | 5.010026  | 0.423460  | -1.080896 | H    | -4.185082 | -2.435766 | -1.791771 |
| H    | 5.440956  | 1.112405  | -1.807878 | O    | -2.820183 | -1.276128 | -0.798089 |

|   |           |           |           |   |           |           |           |
|---|-----------|-----------|-----------|---|-----------|-----------|-----------|
| H | 4.974372  | -0.574665 | -1.526783 | C | -3.472967 | -0.297454 | 2.826293  |
| H | 5.660510  | 0.390770  | -0.204291 | H | -3.559839 | -1.383971 | 2.811532  |
| C | 0.445906  | 2.702752  | 0.474696  | H | -3.357078 | 0.066041  | 3.845582  |
| H | 0.914657  | 2.997635  | 1.412080  | H | -4.350988 | 0.148850  | 2.369656  |
| H | 0.088239  | 3.571288  | -0.073117 | C | -1.645875 | 2.381385  | -1.446023 |
| H | -0.382054 | 2.019203  | 0.631833  | H | -1.784573 | 3.332164  | -0.920974 |
| O | 1.393502  | -1.010699 | -0.887867 | H | -2.589706 | 2.114283  | -1.935875 |
| O | 3.721148  | 0.878393  | -0.722122 | H | -0.897856 | 2.537785  | -2.229277 |
| O | 1.422426  | 2.008264  | -0.354927 | C | -3.978937 | 2.343961  | 0.669418  |
| H | -4.657888 | -0.428964 | 1.140417  | H | -3.059356 | 2.595176  | 1.194310  |
| H | 2.079697  | 2.609765  | -0.736055 | H | -4.146240 | 3.057572  | -0.136474 |
|   |           |           |           | H | -4.820176 | 2.351659  | 1.363394  |
|   |           |           |           | O | -2.335969 | 0.120243  | 2.044966  |
|   |           |           |           | O | -1.201680 | 1.379183  | -0.563153 |
|   |           |           |           | O | -3.791956 | 1.022363  | 0.136817  |
|   |           |           |           | H | -1.508895 | -0.256119 | 2.385512  |
|   |           |           |           | H | -4.507742 | 0.764747  | -0.453372 |

## References

1. J. Liu, X.-Q. Wang, B.-B. Yang, C.-L. Liu, C.-L. Xu and W.-S. Dong, *Renewable Energy*, 2018, **120**, 231-240.
2. X. Chen, Y. Zhang, T. Hou, L. Han and W. Xiao, *Journal of Energy Chemistry*, 2018, **27**, 552-558.
3. T. Galochkina, M. N. F. Chong, L. Challali, S. Abbar and C. Etchebest, *Scientific reports*, 2019, **9**, 998.
4. G. M. G. Maldonado, R. S. Assary, J. A. Dumesic and L. A. Curtiss, *Energy & environmental science*, 2012, **5**, 8990-8997.
5. Y. Zhang, X. Chen, X. Lyu, G. Zhao, T. Zhao, L. Han and W. Xiao, *Journal of Cleaner Production*, 2019, **215**, 712-720.
